# Supplementary material for: Preparation of Chlorophyll Nanoemulsion from Pomelo Leaves and Its Inhibition Effect on Melanoma Cells A375
Source: MDPI journal article supplement (doi:10.3390/plants10081664), 2021-08-12
Supplement: s1 [file s1]

*Supplementary information*

*For*

**Preparation of Chlorophyll Nanoemulsion from Pomelo Leaves and its  
Inhibition Effect on Melanoma Cells A375**

**Man-Hai Liu<sup>1</sup>, Yi-Fen Li<sup>2</sup> and B. H. Chen<sup>2,3,\*</sup>**

<sup>1</sup> Department of Food Science, China University of Science and Technology, Taipei 11581, Taiwan.

<sup>2</sup> Department of Food Science, Fu Jen Catholic University, New Taipei City 24205, Taiwan.

<sup>3</sup> Department of Nutrition, China Medical University, Taichung 404, Taiwan.

\* Correspondence: 002622@mail.fju.edu.tw; Tel.: +886 2 2905 3626; Fax +886 2 2209 3271.

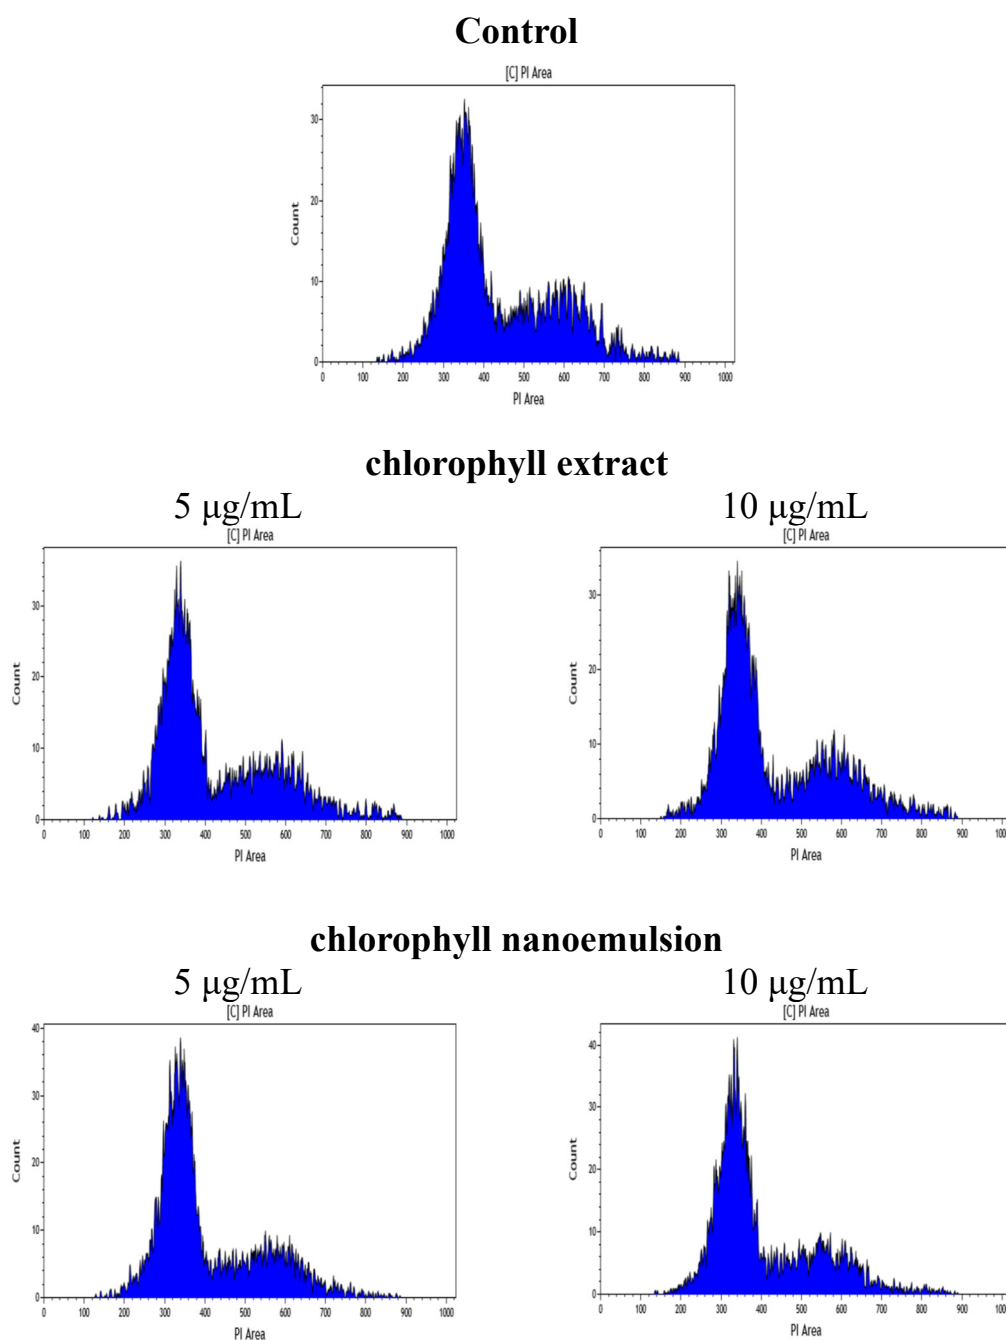

**Figure S1.** Effect of chlorophyll extracts and nanoemulsions on cell cycle distribution of melanoma cells A375. Control represents cells incubated in medium only.
